# Supplementary material for: Improved catalytic combustion of methane using CuO nanobelts with predominantly (001) surfaces
Source: publisher site journal article supplement (doi:10.3762/bjnano.9.235), 2018-09-24
Supplement: Additional file 1 [file 2190-4286-9-235-S1.pdf]

# Supporting Information

for

## Improved catalytic combustion of methane using CuO nanobelts with predominantly (001) surfaces

Qingquan Kong<sup>1</sup>, Yichun Yin<sup>2</sup>, Bing Xue<sup>3,4</sup>, Yonggang Jin<sup>5</sup>, Wei Feng<sup>1</sup>,  
Zhi-Gang Chen<sup>6</sup>, Shi Su<sup>5</sup> and Chenghua Sun<sup>\*7</sup>

Address: <sup>1</sup>School of Mechanical Engineering, Chengdu University, Chengdu 610106, Sichuan, PR China, <sup>2</sup>School of Chemistry, Faculty of Science, Monash University, VIC 3800 Australia, <sup>3</sup>CSIRO Energy, PO Box 883, Kenmore, QLD 4069 Australia, <sup>4</sup>School of Environment and Resources, Southwest University of Science and Technology, Mianyang 621000, PR China, <sup>5</sup>CSIRO Energy, 1 Technology Court, Pullenvale QLD 4069, Australia, <sup>6</sup>Centre for Future Materials, University of Southern Queensland, Springfield QLD 4300, Australia and <sup>7</sup>Department of Chemistry and Biotechnology, Faculty of Science, Engineering & Technology, Swinburne University of Technology, Hawthorn, VIC 3122, Australia

Email: Yonggang Jin - yonggang.jin@csiro.au; Chenghua Sun -

chenghuasun@swin.edu.au

\*Corresponding author

## X-ray diffraction profile

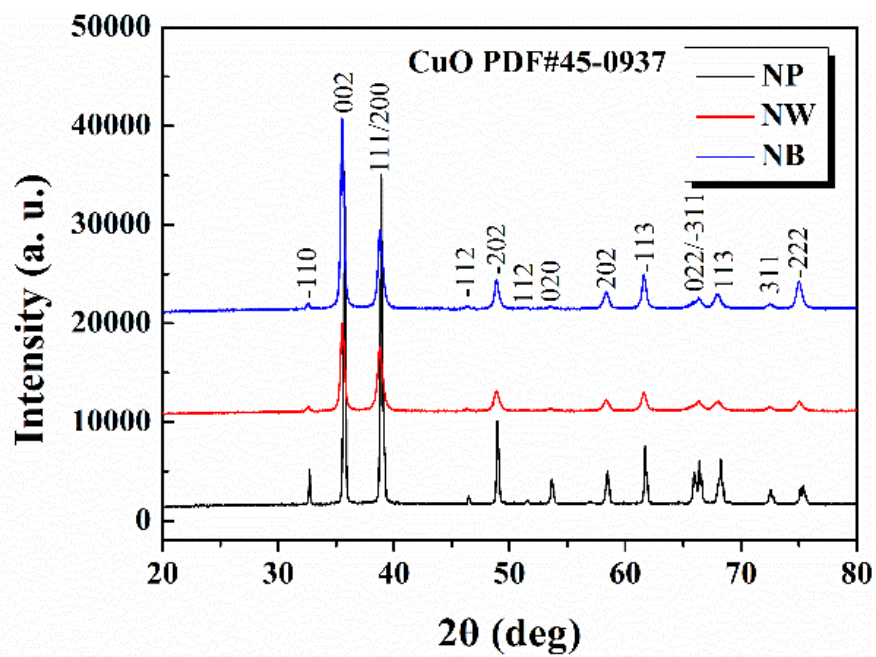

**Figure S1:** X-ray diffraction profile for CuO nanoparticles (NP), nanowires (NW) and nanobelts (NB).
